# Supplementary material for: Moisture-cured solvent free silylated poly(ether-urea) pressure-sensitive adhesives (PSAs) for use as skin adhesives for application in transdermal drug delivery (TDD)
Source: Royal Society of Chemistry journal article supplement (doi:10.1039/d3ma01104f), 2024-01-01
Supplement: d3ma01104f1.pdf [file d3ma01104f1.pdf]

## Electronic Supplementary Information

### A New Class of Moisture-cured Solvent free Silylated Poly(ether-urea) Pressure-Sensitive Adhesives for use in Adhesion to Skin and in Transdermal Drug Delivery (TDD)

Spyridon Efsthathiou,<sup>a</sup> Gabit Nurumbetov,<sup>a</sup> Andrew Ross,<sup>a</sup> Yongguang Li,<sup>a</sup> and David M. Haddleton<sup>\*a,b</sup>

<sup>a</sup>Medherant Ltd, The Venture Centre University of Warwick Science Park, Coventry, CV4 7EZ, UK

<sup>b</sup>Department of Chemistry, University of Warwick, Gibbet Hill Road, Coventry, CV4 7AL, UK

#### Contents

|     |                                                                    |   |
|-----|--------------------------------------------------------------------|---|
| 1   | Supplementary pictures .....                                       | 2 |
| 2   | Supplementary analysis and experimental data .....                 | 3 |
| 2.1 | Characterisation of commercial polyetheramines .....               | 3 |
| 2.2 | Additional data from the synthesis of the PUXL PSA adhesives ..... | 7 |

## 1 Supplementary pictures

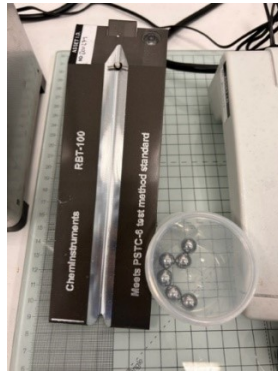

**Figure S1.** Rolling Ball ramp used to evaluate the tackiness of the cured adhesives.

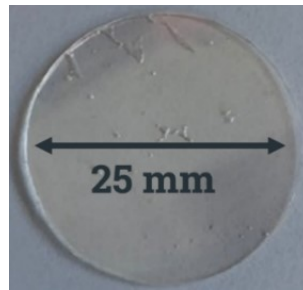

**Figure S2.** 25 mm cured adhesive disc between two release liners used for rheology analysis.

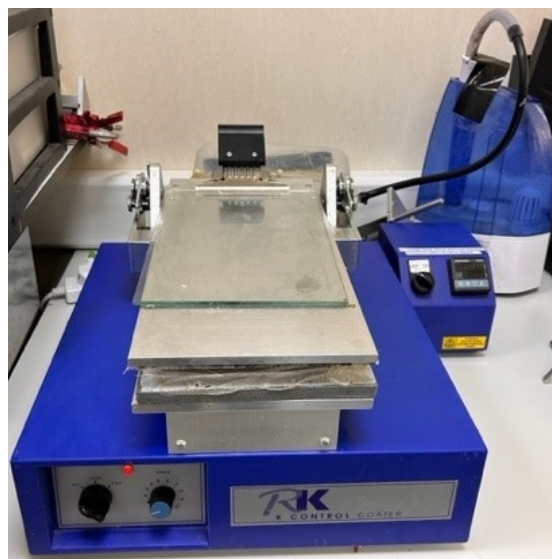

**Figure S3.** The setup of coater and humidifier used for curing adhesives.

## 2 Supplementary analysis and experimental data

### 2.1 Characterisation of commercial polyetheramines

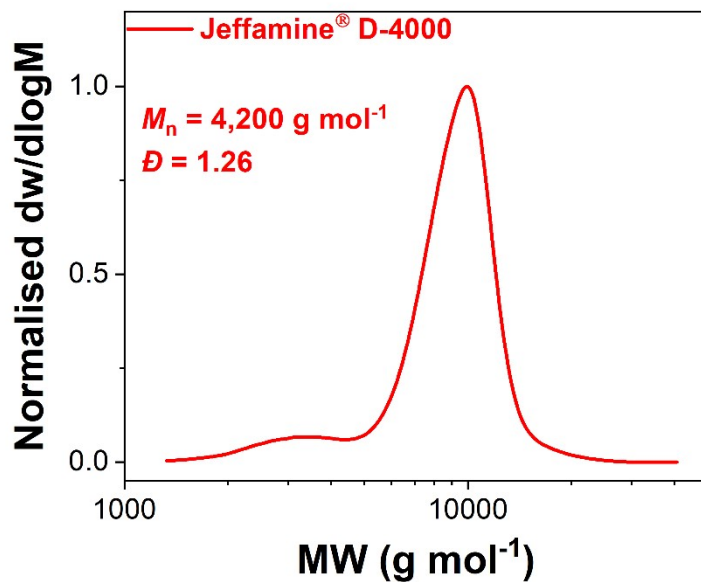

Figure S4. Molecular weight distribution traces of commercial Jeffamine® D-4000 as determined by SEC with DMF as eluent.

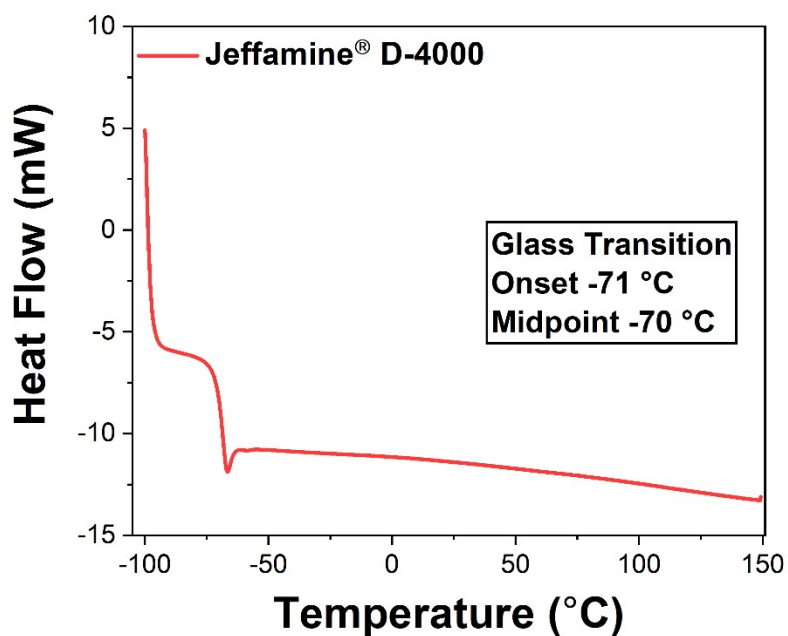

Figure S5. DSC thermogram of commercial Jeffamine® D-4000 using a heating rate of  $10 \text{ }^{\circ}\text{C min}^{-1}$  (exo up) during the second thermal cycle.

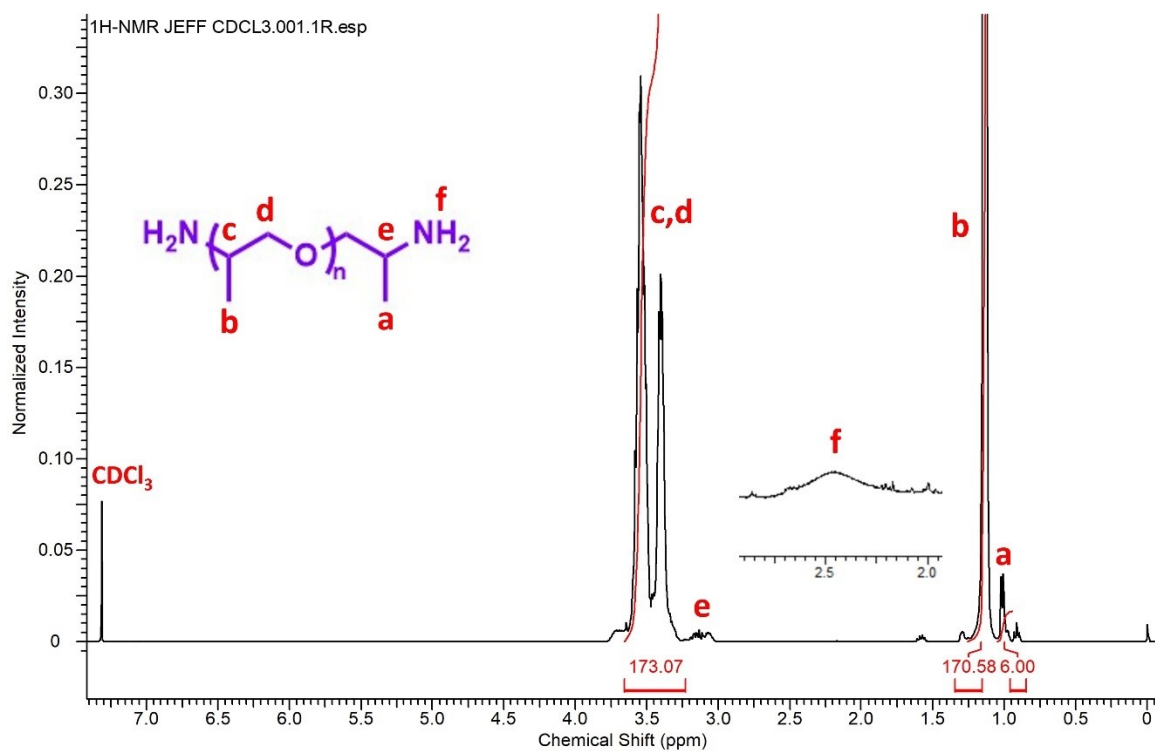

Figure S6. <sup>1</sup>H-NMR (400 MHz, CDCl<sub>3</sub>) of Jeffamine<sup>®</sup> D-4000.

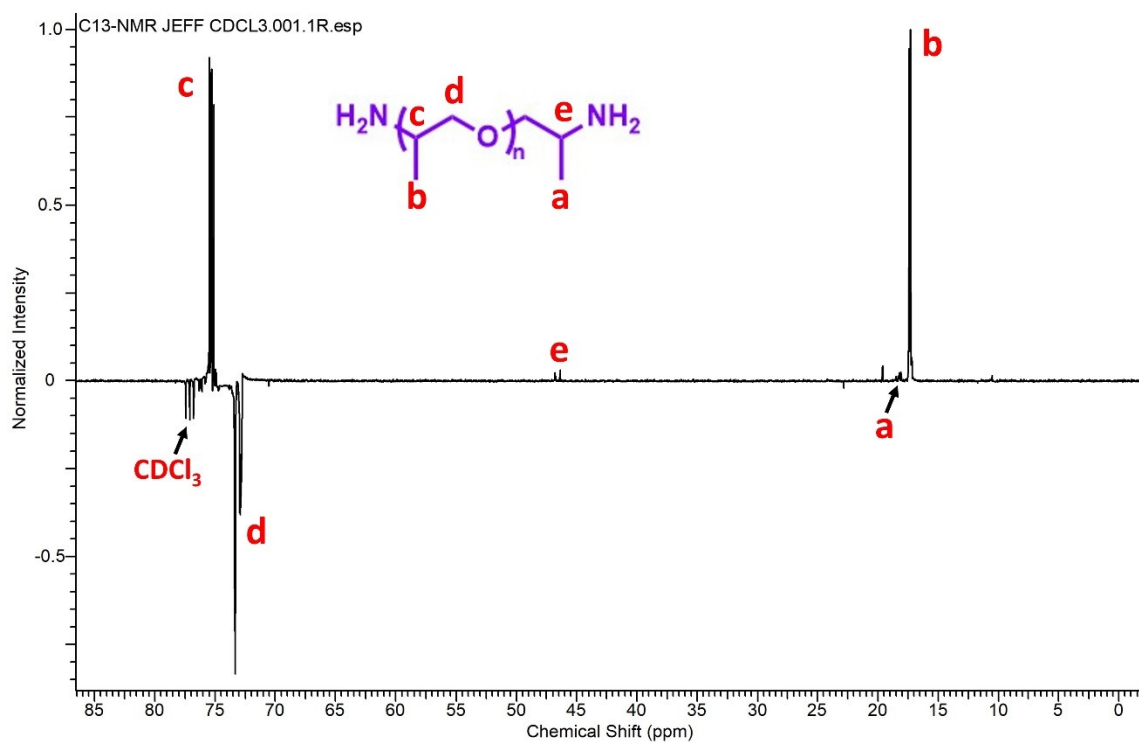

Figure S7. <sup>13</sup>C-NMR (400 MHz, CDCl<sub>3</sub>) of Jeffamine<sup>®</sup> D-4000.

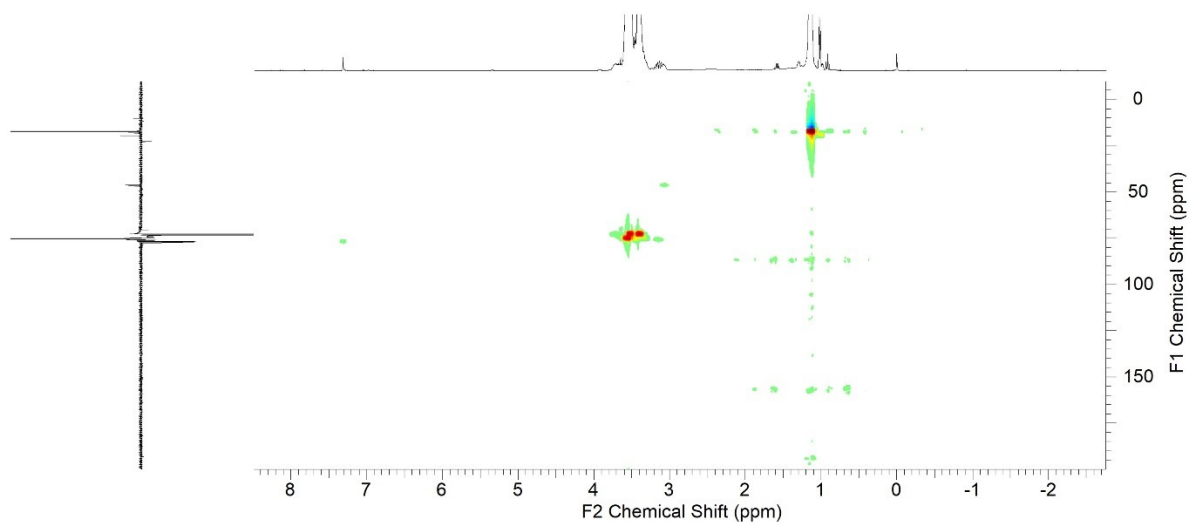

Figure S8. HSQC (400 MHz,  $\text{CDCl}_3$ ) spectrum of Jeffamine<sup>®</sup> D-4000.

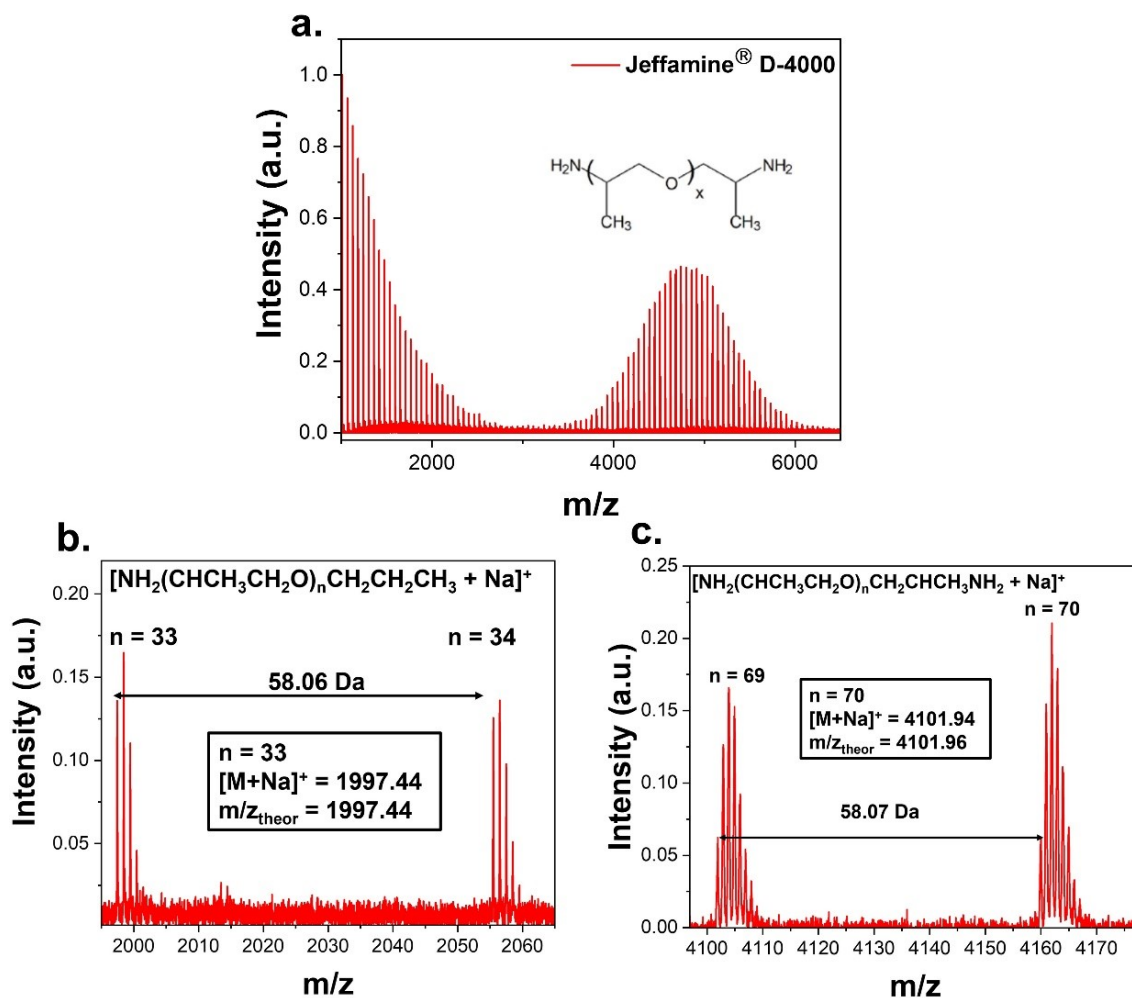

Figure S9. MALDI-ToF analysis of commercial Jeffamine<sup>®</sup> D-4000 (a) MALDI spectra along with (b) zoomed region for the monofunctional species and (c) zoomed region for the difunctional species.

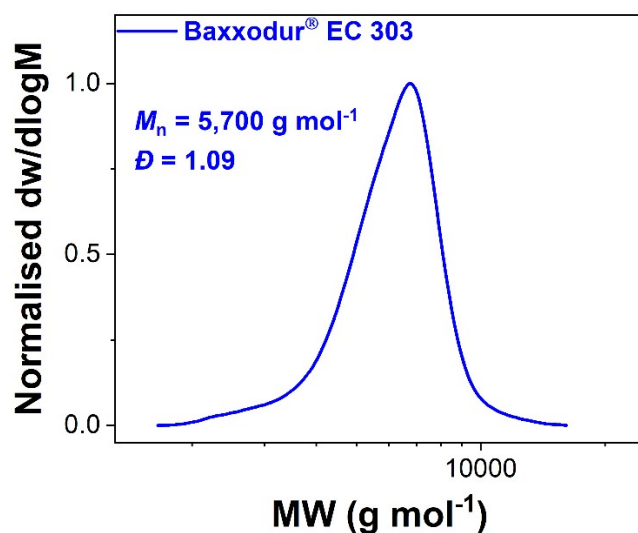

Figure S10. Molecular weight distribution traces of commercial Baxxodur® EC 303 as determined by SEC in DMF.

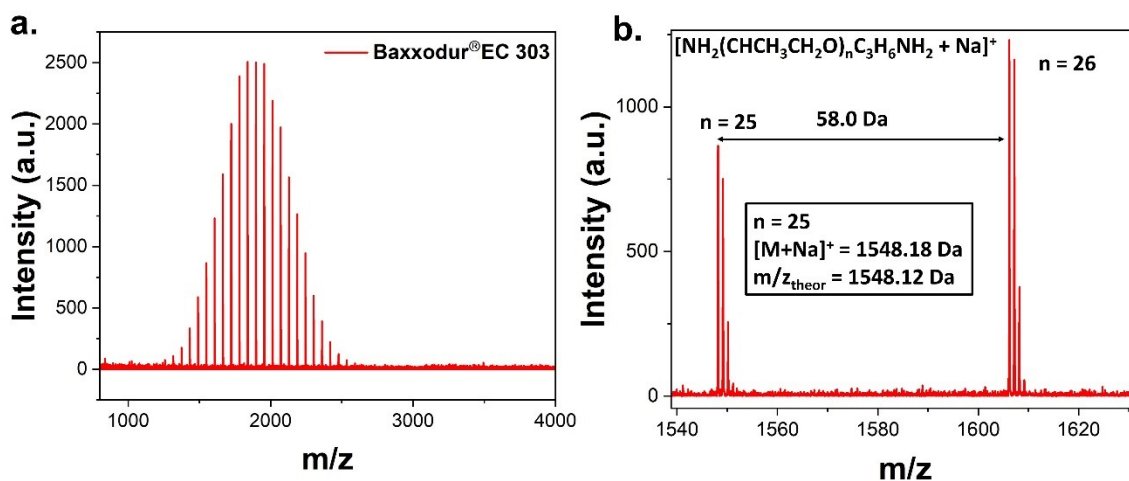

Figure S11. MALDI-ToF analysis of commercial Baxxodur® EC 303 (a) MALDI spectra along with (b) zoomed region.

## 2.2 Additional data from the synthesis of the PUXL PSA adhesives

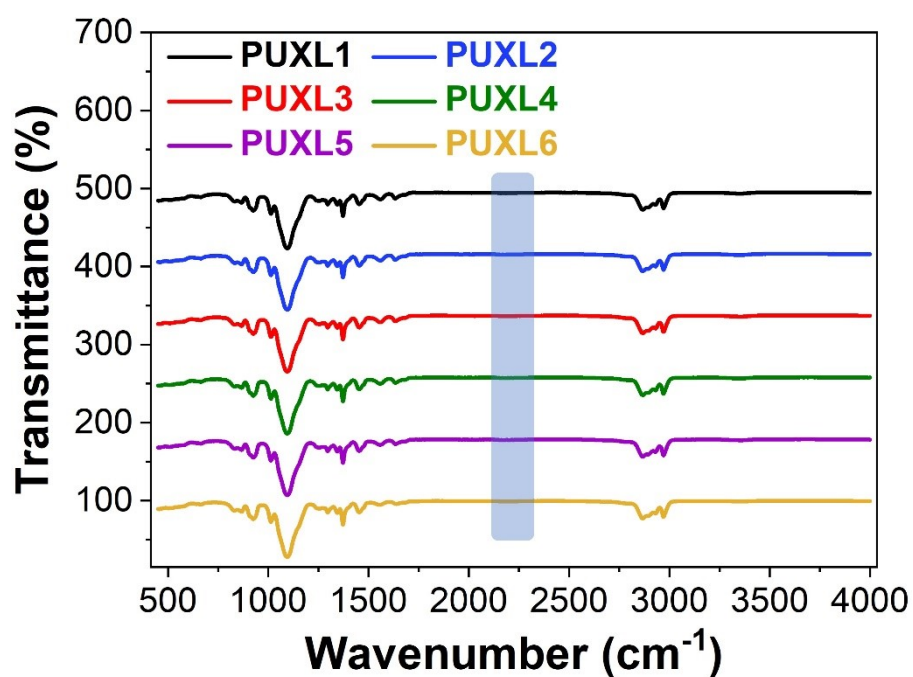

**Figure S12.** FT-IR spectra from the synthesis of the PUXL prepolymer variants. The absence of -CNO groups after the end of each step is highlighted.

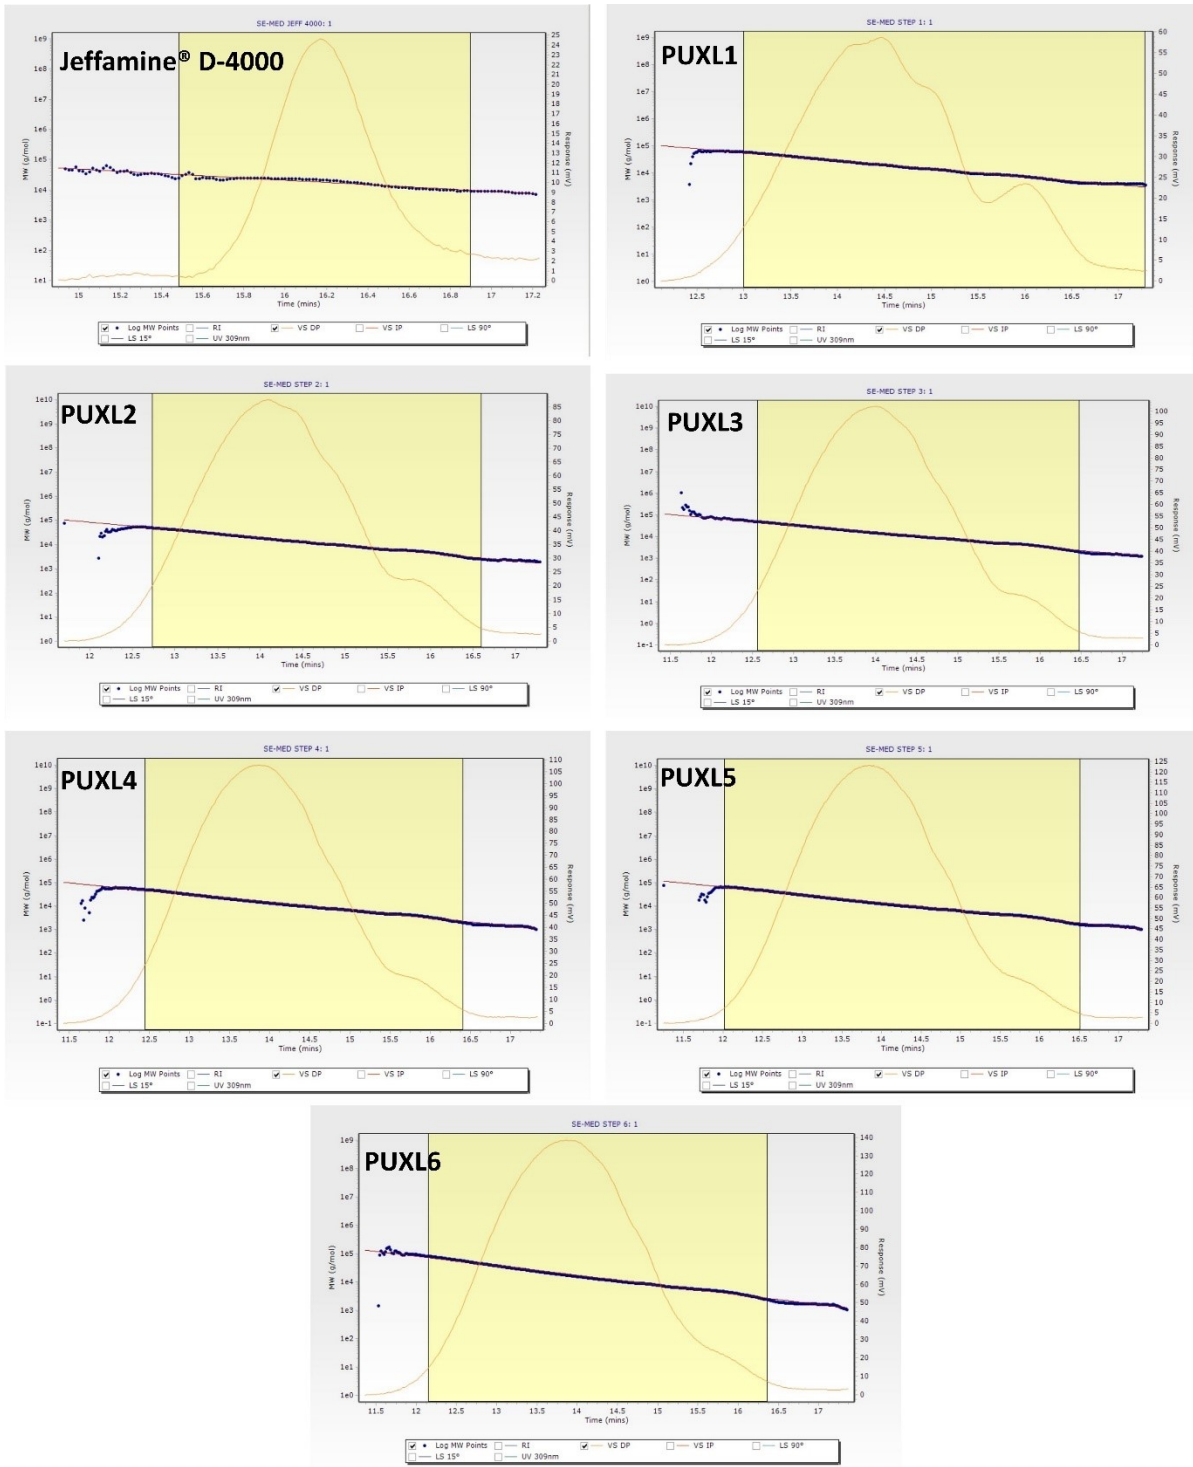

Figure S13. Mark Houwink plots fitting curves utilising the VS DP data.



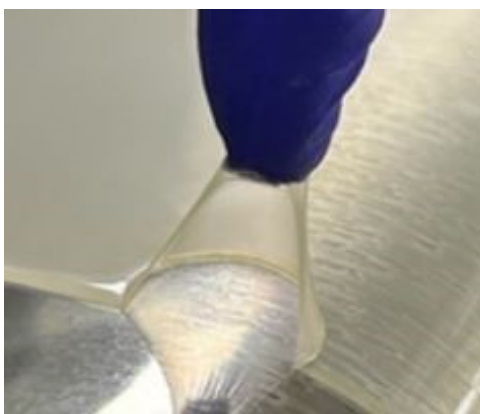

**Figure S14.** Finger tack test demonstrating a cured PUXL formulation. No cohesion failure was noticed upon peeling.

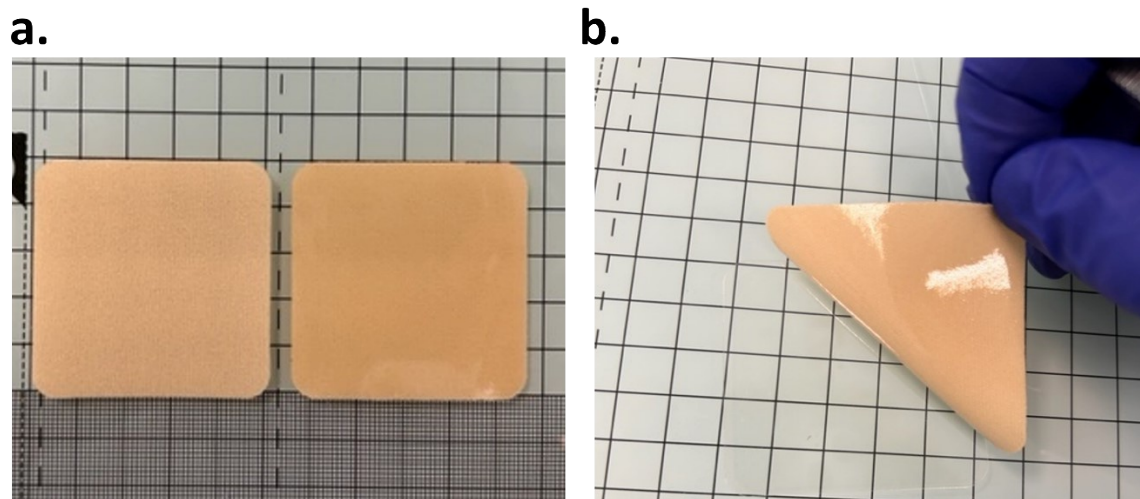

**Figure S15.** (a) Cured PUXL5 adhesive in a fabric backing liner, (b) clean removal of the cured adhesive from the release liner.

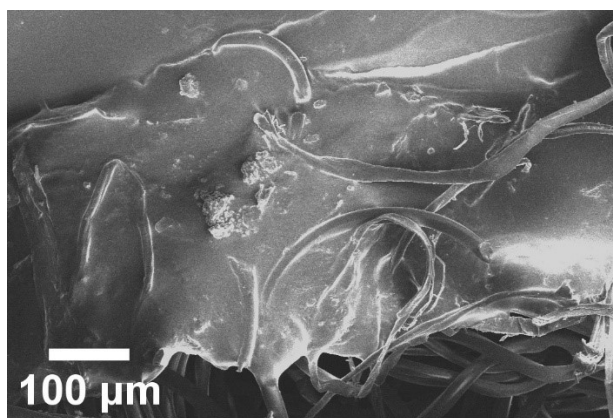

**Figure S16.** SEM image of the PUXL5 adhesive coated in a fabric backing liner.

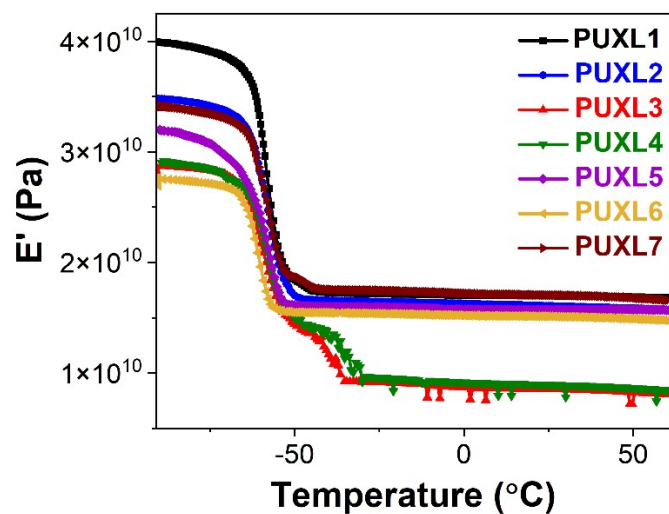

**Figure S17.** DMA curves of elastic modulus ( $E'$ ) evolution with temperature for all PUXL cured variants.

| Entry             | TGA        |               | DSC               | DMA               |
|-------------------|------------|---------------|-------------------|-------------------|
|                   | $T_d$ (°C) | Mass Loss (%) | $T_{g, mid}$ (°C) | $T_{g, DMA}$ (°C) |
| Jeffamine® D-4000 | -          | -             | -70               | -                 |
| PUXL1             | ~ 380      | 97            | -69               | -56               |
| PUXL2             | ~ 380      | 99            | -68               | -55               |
| PUXL3             | ~ 380      | 98            | -68               | -56               |
| PUXL4             | ~ 380      | 97            | -68               | -56               |
| PUXL5             | ~ 380      | 98            | -69               | -56               |
| PUXL6             | ~ 380      | 99            | -68               | -59               |
| PUXL7             | ~ 380      | 98            | -68               | -56               |

**Table S1.** Thermal data of the PUXL variants as analysed by TGA, DSC and DMA.

**Table S2.** Rheological data of cured PUXL variants for  $\omega = 0.01$  and  $100 \text{ rad s}^{-1}$  measured at  $25 \text{ }^\circ\text{C}$  using plate-plate oscillatory rheology. Values were used for Chang's windows graphs.

| <b>Entry</b> | <b><math>G'_{0.01}</math><br/>(Pa)</b> | <b><math>G''_{0.01}</math><br/>(Pa)</b> | <b><math>G'_{100}</math><br/>(Pa)</b> | <b><math>G''_{100}</math><br/>(Pa)</b> |
|--------------|----------------------------------------|-----------------------------------------|---------------------------------------|----------------------------------------|
| PUXL1        | $7,930 \pm 660$                        | $1,150 \pm 460$                         | $40,950 \pm 16,850$                   | $22,750 \pm 8,200$                     |
| PUXL2        | $2,250 \pm 47$                         | $161 \pm 93$                            | $17,100 \pm 950$                      | $3,260 \pm 400$                        |
| PUXL3        | $563 \pm 18$                           | $29 \pm 2$                              | $22,300 \pm 8,300$                    | $18,900 \pm 5,150$                     |
| PUXL4        | $315 \pm 30$                           | $36 \pm 7$                              | $24,720 \pm 13,020$                   | $19,500 \pm 2,040$                     |
| PUXL5        | $275 \pm 47$                           | $17 \pm 3$                              | $14,030 \pm 350$                      | $11,670 \pm 380$                       |
| PUXL6        | $197 \pm 50$                           | $74 \pm 16$                             | $4,750 \pm 370$                       | $5,900 \pm 890$                        |
| PUXL7        | $309 \pm 11$                           | $30 \pm 8$                              | $20,810 \pm 3,250$                    | $18,390 \pm 3,180$                     |

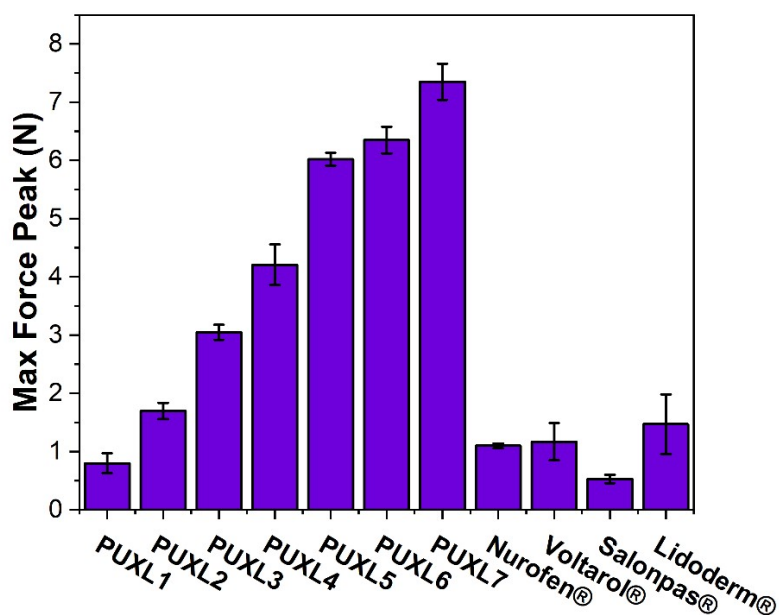

**Figure S18.** Max Force peak of all analysed adhesives attained from the 90° peel tests.

**Table S3.** Cold flow results for different PUXL variants in triplicates as determined at ambient temperature, 32 °C and 40 °C.

| Variant | Temp      | Initial Size (mm) |    |    | Size after 72 hrs (mm) |    |    | % difference after 72 hrs |      |    |         |
|---------|-----------|-------------------|----|----|------------------------|----|----|---------------------------|------|----|---------|
|         |           | R1                | R2 | R3 | R1                     | R2 | R3 | R1                        | R2   | R3 | Average |
| PUXL1   | Room Temp | 9                 | 9  | 9  | 9                      | 9  | 9  | 0                         | 0    | 0  | 0.00    |
| PUXL1   | 32 °C     | 9                 | 9  | 9  | 9                      | 9  | 9  | 0                         | 0    | 0  | 0.00    |
| PUXL1   | 40 °C     | 9                 | 9  | 9  | 9                      | 9  | 9  | 0                         | 0    | 0  | 0.00    |
| PUXL2   | Room Temp | 9                 | 9  | 9  | 9                      | 9  | 9  | 0                         | 0    | 0  | 0.00    |
| PUXL2   | 32 °C     | 9                 | 9  | 9  | 9                      | 9  | 9  | 0                         | 0    | 0  | 0.00    |
| PUXL2   | 40 °C     | 9                 | 9  | 9  | 9                      | 9  | 9  | 0                         | 0    | 0  | 0.00    |
| PUXL3   | Room Temp | 9                 | 9  | 11 | 9                      | 9  | 11 | 0                         | 0    | 0  | 0.00    |
| PUXL3   | 32 °C     | 9                 | 9  | 9  | 9                      | 10 | 9  | 0                         | 11.1 | 0  | 3.70    |
| PUXL3   | 40 °C     | 10                | 9  | 9  | 10                     | 9  | 9  | 0                         | 0    | 0  | 0.00    |
| PUXL4   | Room Temp | 9                 | 9  | 9  | 9                      | 9  | 9  | 0                         | 0    | 0  | 0.00    |
| PUXL4   | 32 °C     | 9                 | 10 | 9  | 9                      | 10 | 9  | 0                         | 0    | 0  | 0.00    |
| PUXL4   | 40 °C     | 9                 | 9  | 9  | 9                      | 9  | 9  | 0                         | 0    | 0  | 0.00    |

|       |           |    |    |    |    |    |    |   |   |      |      |
|-------|-----------|----|----|----|----|----|----|---|---|------|------|
| PUXL5 | Room Temp | 9  | 9  | 9  | 9  | 9  | 9  | 0 | 0 | 0    | 0.00 |
| PUXL5 | 32 °C     | 9  | 9  | 9  | 9  | 9  | 10 | 0 | 0 | 11.1 | 3.70 |
| PUXL5 | 40 °C     | 9  | 10 | 9  | 9  | 10 | 9  | 0 | 0 | 0    | 0.00 |
| PUXL6 | Room Temp | 11 | 9  | 9  | 11 | 9  | 9  | 0 | 0 | 0    | 0.00 |
| PUXL6 | 32 C      | 9  | 9  | 9  | 9  | 9  | 9  | 0 | 0 | 0    | 0.00 |
| PUXL6 | 40 C      | 9  | 9  | 9  | 9  | 9  | 9  | 0 | 0 | 0    | 0.00 |
| PUXL7 | R.T.      | 10 | 9  | 9  | 10 | 9  | 9  | 0 | 0 | 0    | 0.00 |
| PUXL7 | 32 C      | 9  | 9  | 10 | 9  | 9  | 10 | 0 | 0 | 0    | 0.00 |
| PUXL7 | 40 C      | 9  | 9  | 9  | 9  | 9  | 9  | 0 | 0 | 0    | 0.00 |
